# Supplementary material for: Whole-exome sequencing identifies a potential TTN mutation in a multiplex family with inguinal hernia
Source: Springer Nature journal article supplement (doi:10.1007/s10029-016-1491-9), 2016-04-26
Supplement: MOESM1 [file 10049206]

Supplementary Table 1: Primer sequences used for mutation analysis of *TTN, CDH23* and *KRTAP12-4.*

| **Gene** |  | **Primer sequence** | **Length bp** |
| --- | --- | --- | --- |
| *TTN* | L R | 5'-CACTGCTGACCTCACTGGAAT-3' 5'-TGCCTCCTCCATCTTTAGGTT-3' | 377 |
| *CDH23* | L R | 5'-GCAGATTTTAGGGGGTTCTTCT-3' 5'-AATCTGTTCCAGGCTCTACCAA-3' | 463 |
| *KRTAP12-4* | L R | 5'-GGGTATAAAGGCCACCTAAGGA-3' 5'-GTGCTCCAGGTGACAGGTCTAT-3' | 400 |
